# Supplementary material
Source: Elsevier journal article supplement (https://www.sciencedirect.com/science/article/pii/S1665268121000144)
Supplement: mmc1 [file S1665268121000144:mmc1.docx]

# SUPPORTING INFORMATION

# Figure S1 Study-selection flow – Meta-analyses of randomized controlled trials

**830** potentially eligible studies identified by database search

**110** duplicates removed

**720** studies identified for screening

**557** studies excluded due to non-relevance after a title/abstract screening

**163** full-text studies assessed for eligibility

**157** studies excluded after a full-text assessment:

- 94 Not meta-analysis
- 32 NAFLD
- 20 Not meta-analysis of RCTs
- 8 Full-text articles cannot be retrieved
- 3 Outcomes of interest were not investigated

**6** eligible studies

- 3 NASH only
- 3 NASH and/or NAFLD

# Figure S2 Study-selection flow – randomized controlled trials indexed in PubMed during 2015 to 2020

**492** potentially eligible studies identified by database search

**292** studies excluded due to non-relevance after a title/abstract screening

**200** full-text studies assessed for eligibility

**178** studies excluded after a full-text assessment:

- 154 NAFLD
- 9 Unable to extract data (pre-post changes)
- 7 Not RCTs
- 4 Cited in the included MAs of RCTs
- 4 Outcomes of interest were not investigated

**22** eligible studies

# Figure S3 Study-selection flow – randomized controlled trials registered in ClinicalTrial.gov during 2015 to 2020

**543** potentially eligible study records identified by database search

**80** study records excluded due to non-relevance after a title/abstract screening

**463** detail study records assessed for eligibility

**385** studies excluded after a full-text assessment:

- 173 Not RCTs
- 161 NAFLD
- 12 Diagnosis
- 9 Cirrhosis
- 8 Duplicate articles with conference abstracts
   presented at AASLD or EASL
- 7 Unknown
- 5 Duplicate articles with RCTs in PubMed
- 5 Withdrawn
- 5 Terminated

**70** eligible study records

- 62 ongoing trial
- 8 completed trial with no
   reported results yet

**8** Additional published trials

**Table S1 Characteristics of meta-analyses of randomized controlled trials of interventions for nonalcoholic steatohepatitis**

| **First author** | **Year** | **No. of studies** | **Population** | **Intervention (s)** | **Comparator (s)** |
| --- | --- | --- | --- | --- | --- |
| Mahady SE(1) | 2011 | 7 | NASH only | Thiazolidinediones: Pioglitazone, Rosiglitazone | Placebo OR Active comparators |
| Li Y(2) | 2013 | 9 | NASH and/or NAFLD | Metformin | Placebo |
| **Sawangjit R(3) | 2016 | 44 | NASH and/or NAFLD | Pharmacological and non-pharmacological interventions | Placebo OR Active comparators |
| Said A(4) | 2017 | 9 | NASH only | Thiazolidinediones: Pioglitazone, Rosiglitazone | Placebo |
| **Lombardi R(5) | 2017 | 77 | NASH and/or NAFLD | Pharmacological interventions | Placebo OR Active comparators |
| Li Y(6) | 2018 | 8 | NASH only | Angiotensin receptor blockers | Placebo |

Note: * Network meta-analysis

Abbreviations: NASH – nonalcoholic steatohepatitis, NAFLD – nonalcoholic fatty liver disease

**Table S2 Characteristics of randomized controlled trials of interventions for nonalcoholic steatohepatitis (Trials are obtained from PubMed)**

| **First author** | **Year** | **Phase** | **Population** | **Intervention** | **Comparator** | **Duration  (months)** | **Title acronym** |
| --- | --- | --- | --- | --- | --- | --- | --- |
| Lalazar G(7) | 2015 | 2a | NASH | Muromonab-CD3 0.2 mg (n=9)  Muromonab-CD3 1 mg (n=9)  Muromonab-CD3 5 mg (n=9) | Placebo (n=9 | 1 |  |
| Abd El-Kader SM(8) | 2016 | - | NASH with BMI of 30 to 35 kg/m2 | Moderate aerobic exercise (n=50) | No intervention (n=50) | 3 |  |
| Armstrong MJ(9) | 2016 | 2 | NASH | Liraglutide 1.8 mg (n=7) | Placebo (n=7) | 3 | LEAN |
| Armstrong MJ(10) | 2016 | 2 | NASH | Liraglutide 1.8 mg (n=26) | Placebo (n=26) | 12 | LEAN |
| Cusi K(11) | 2016 | 4 | NASH with prediabetes or T2DM | Pioglitazone 45 mg (n=50) | Placebo (51) | 36 |  |
| Ratziu V(12) | 2016 | 2 | NASH without cirrhosis | Elafibranor 80 mg (n=93)  Elafibranor 120 mg (n=91) | Placebo (n=91) | 12 | GOLDEN-505 |
| Joy TR(13) | 2017 | - | NASH | Sitagliptin 100 mg (n=6) | Placebo (n=6) | 6 |  |
| Wah Kheong C(14) | 2017 | 2 | NASH with a NAS ≥4 | Silymarin 700 mg (n=49) | Placebo (n=50) | 12 |  |
| Abdel-Razik A(15) | 2018 | - | NASH | Rifaximin 1,100 mg (n=25) | Placebo (n=25) | 6 |  |
| Friedman SL(16) | 2018 | 2b | NASH with stage F1-F3 fibrosis and a NAS ≥4 | Cenicriviroc 150 mg (n=145) | Placebo (n=144) | 12 (interim analysis) | CENTAUR |
| Geier A(17) | 2018 | - | NASH | Vitamin D 2100 IU (n=10) | Placebo (n=10) | 12 |  |
| Harrison SA(18) | 2018 | 2 | NASH with stage F1-F3 fibrosis, a NAS ≥4, and ≥8% hepatic fat content | Aldafermin (NGM282) 3 mg (n=27)  Aldafermin (NGM282) 6 mg (n=28) | Placebo (n=27) | 3 |  |
| Harrison SA(19) | 2018 | 2b | NASH with bridging fibrosis (F3) | Simtuzumab 75 mg (n=71)  Simtuzumab 125 mg (n=74) | Placebo (n=74) | 24 | GS-US-321-0105 |
| Loomba R(20) | 2018 | 2 | NASH with stage F1-F3 fibrosis or ≥8% hepatic fat content, and ≥2.5 kPa liver stiffness | Firsocostat 5 mg (n=51)  Firsocostat 20 mg (n=49) | Placebo (n=26) | 3 |  |
| Barbakadze G(21) | 2019 | - | NASH | Ursodeoxycholic acid 15 mg (n=NR) | Vitamin E 800 mg plus Vitamin C 500 mg (n=NR) | 12 |  |
| Bomhof MR(22) | 2019 | - | NASH with a NAS ≥5 | Prebiotic: Oligofructose 8 g for 12 weeks followed by 16 g for 24 weeks (n=8) | Isocaloric placebo (n=6) | 9 |  |
| Ghetti FF(23) | 2019 | - | NASH | Dietary intervention plus Nutritional orientation (n=20) | Nutritional orientation (n=20) | 3 |  |
| Harrison SA(24) | 2019 | 2 | NASH with stage F1-F3 fibrosis | Resmetirom 80 mg (n=84) | Placebo (n=41) | 36 |  |
| Navarro VJ(25) | 2019 | 2 | NASH without cirrhosis with a NAS ≥ 4 | Silymarin 420 mg (n=27)  Silymarin 700 mg (n=26) | Placebo (n=25) | 12 | SyNCH |
| Oliveira CP(26) | 2019 | - | NASH | N-acetylcysteine 1.2 g plus Ursodeoxycholic acid 15 mg/kg plus Metformin 850-1,500 mg (n=26) | Ursodeoxycholic acid 20 mg/kg plus Metformin 850-1,500 mg (n=13)  N-acetylcysteine plus Metformin 850-1,500 mg (n=14) | 12 |  |
| Oshakbayev K(27) | 2019 | - | Severe NASH with T2DM | Fast weight loss (n=44) | Conventional drug treatment (n=36) | 12 |  |
| Sanyal A(28) | 2019 | 2a | NASH with stage F1-F3 fibrosis, ≥8% hepatic fat content, and ≥25 kg/m2 BMI | Pegbelfermin 10 mg once a day (n=25)  Pegbelfermin 20 mg once a week (n=24) | Placebo (n=26) | 4 |  |
| Younossi ZM(29) | 2019 | 3 | NASH with stage F2-F3 fibrosis | Obeticholic acid 10 mg (n=312)  Obeticholic acid 25 mg (n=308) | Placebo (n=308) | 18 (interim analysis) | REGENERATE |
| Harrison SA(30) | 2020 | 2b | NASH with stage F1-F3 fibrosis | MSDC-0602K 62.5 mg (n=99)  MSDC-0602K 125 mg (n=98)  MSDC-0602K 250 mg (n=101) | Placebo (n=94) | 12 | EMMINENCE |
| Harrison SA(31) | 2020 | 3 | NASH and bridging fibrosis (F3) | Selonsertib 6 mg (n=321)  Selonsertib 18 mg (n=322) | Placebo (n=159) | 12 | STELLAR-3 |
| Harrison SA(32) | 2020 | 2 | NASH with stage F1-F3 fibrosis | Emricasan 5 mg (n=107)  Emricasan 50 mg (n=106) | Placebo (n=105) | 18 | ENCORE-NF |
| Newsome PN(33) | 2020 | 2 | NASH with ≥5 steatosis without cirrhosis | Volixibat 5 mg (n=49)  Volixibat 10 mg (n=50)  Volixibat 20 mg (n=49) | Placebo (n=49) | 12 |  |
| Newsome PN(34) | 2020 | 2 | NASH with stage F1-F3 liver fibrosis | Semaglutide 0.1 mg (n=80)  Semaglutide 0.2 mg (n=78)  Semaglutide 0.4 mg (n=82) | Placebo (n=80) | 18 | NN9931-4296 |
| Patel K(35) | 2020 | 2 | NASH ≥8% hepatic fat content, and ≥2.5 kPa liver stiffness or historical liver biopsy | Cilofexor 30 mg (n=56)  Cilofexor 100 mg (n=56) | Placebo (n=28) | 6 |  |
| Ratziu V(36) | 2020 | 2b | NASH with stage F1-F3 fibrosis and a NAS ≥4 | Cenicriviroc 150 mg for 2 years (n=145)  Placebo for 1 year then Cenicriviroc 150 mg for 1 year (n=72) | Placebo for 2 years (n=72) | 24 | CENTAUR |
| Abdelmalek MF(37) | AASLD 2018 | 2a | NASH with a NAS ≥4 | IMM-124E 600 mg (n=43)  IMM-124E 1200 mg (n=46) | Placebo (n=44) | 6 |  |
| Diehl AM(38) | EASL 2018 | 2 | NASH with stage F1-F3 fibrosis, a NAS ≥4 (1 point in each component), ≥6% hepatic fat content, and elevated liver aminotransferases | JKB-121 5 mg (n=21)  JKB-121 10 mg (n=22) | Placebo (n=22) | 6 |  |
| Port G(39) | EASL 2019 | N/A | NASH | Probiotics; Lactobacillus acidophilus 1x109 CFU and Bifidobacterium lactis 1x109 CFU (n=NR) | Placebo (n=NR) | 6 |  |
| Francque SM(40) | AASLD 2020 | 2b | Non-cirrhotic, highly active NASH with a SAF score of 3-4 | Lanifibranor 800 mg (n=83)  Lanifibranor 1200 mg (n=83) | Placebo (n=81) | 6 | NATIVE |
| Harrison SA(41) | AASLD 2020 | 2a | NASH with stage F1-F3 fibrosis | Efruxifermin 28 mg (n=19)  Efruxifermin 50 mg (n=20)  Efruxifermin 70 mg (n=20) | Placebo (n=21) | 4 | BALANCED |
| Harrison SA(42) | AASLD 2020 | 2b | NASH with stage F2-F3 fibrosis, a NAS ≥ 4, and ≥8% hepatic fat content | Aldafermin (NGM 282) 1 mg (n=53) | Placebo (n=25) | 6 | ALPINE 2/3 |
| Loomba R(43) | AASLD 2020 | 2 | NASH with stage F1-F3 fibrosis, ≥8% hepatic fat content | TVB-2640 25 mg (n=30)  TVB-2640 50 mg (n=28) | Placebo (n=27) | 3 | FASCINATE-1 |
| Lucas KJ(44) | AASLD 2020 | 2 | NASH with stage F2-F3 fibrosis | Tropifexor 140 mcg (n=50) Tropifexor 200 mcg (n=51) | Placebo (n=51) | 11 | FLIGHT-FXR |
| Aspinall R(45) | EASL 2020 | 2 | NASH | Nidufexor 50 mg (n=44)  Nidufexor 100 mg (n=37) | Placebo (n=40) | 3 |  |
| Lawitz E(46) | EASL 2020 | 2 | NASH | MET409 50 mg (n=19)  MET409 80 mg (n=20) | Placobo (n=19) | 3 |  |
| Ratziu V(47) | EASL 2020 | 2a | Non-cirrhotic, fibrotic NASH | EDP-305 1 mg (n=55)  EDP-305 2.5 mg (n=53) | Placebo (n=24) | 3 | ARGON-1 |

Abbreviations: BMI – body mass index, CFU – colony forming unit, N/A – not applicable, NAS – nonalcoholic fatty liver disease activity score, NASH – nonalcoholic steatohepatitis, NR- not report, SAF score – steatosis, activity, and fibrosis score, T2DM – type 2 diabetes mellitus

**Table S*3* Characteristics of randomized controlled trials of interventions for nonalcoholic steatohepatitis registered on ClinicalTrials.gov**

| **Phase** | **Therapeutic class** | **Intervention** | **NCT** | **Title acronym** | **Intervention group** | **Comparator group** | **Target sample size** | **Duration (months)** | **Key primary endpoint** | **Key secondary histological endpoint** |
| --- | --- | --- | --- | --- | --- | --- | --- | --- | --- | --- |
| **Completed RCTs** | | | | | | | | | | |
| 1 | FXR agonist | EYP001a | NCT03976687 |  | EYP001a Dose A,  EYP001a Dose B | EYP001a  Dose C | 16 | 1 week | Pharmacokinetics, Adverse events |  |
| 1/2 | ACC inhibitor | Gemcabene | NCT03508687 |  | Gemcabene 300 mg | Gemcebene 300-600 mg | 5 | 6 | Triglycerides | NAS |
| 2 | A3 adenosine receptor agonist | CF102 | NCT02927314 |  | CF102 | Placebo | 60 | 3 | **ALT, Hepatic fat content by MRI-PDFF** |  |
| 2 | AOC3 inhibitor | BI 1467335 | NCT03166735 |  | BI 1467335 | Placebo | 114 | 4 | Plasma AOC3 activity |  |
| 2 | Mineralocorticoid receptor antagonist | Apararenone (MT-3995) | NCT02923154 |  | MT-3995 | Placebo | 48 | 18 | ALT |  |
| 2 | FXR agonist + Unspecified mechanism | Ursodeoxycholic acid + Berberine salt (HTD1801) | NCT03656744 |  | HTD1801 | Placebo | 100 | 18 | **Hepatic fat content by MRI-PDFF** |  |
| 2 | GLP-1 receptor agonist | Semaglutide | NCT03987074 |  | Semaglutide | Firsocostat or Cilofexor | 109 | 6 | Adverse events |  |
| 2/3 | SCD inhibitor | Aramchol | NCT02279524 | Aramchol_005 | Aramchol 400 mg, Aramchol 600 mg | Placebo | 247 | 12 | Hepatic fat content by NMRS | **≥1 improvement in fibrosis with no worsening of NASH, ≥2 improvement in NAS with no worsening of fibrosis,** ≥2 improvement in SAF with no worsening of fibrosis**, NASH resolution without worsening of fibrosis** |
| **Ongoing RCTs** | | | | | | | | | | |
| 1 | Galectin-3 antagonist | GB1211 | NCT03809052 |  | GB1211 | Placebo | 87 | 3 | Adverse events |  |
| 1 | RNAi | ALN-HSD | NCT04565717 |  | ALN-HSD | Placebo | 128 | 12 | Adverse events | Pharmacokinetics |
| 1 | RNAi | ARO-HSD | NCT04202354 |  | ARO-HSD Injection | Placebo | 74 | 1 | Adverse events |  |
| 1 | RNAi | AZD2693 | NCT04483947 |  | AZD2693 | Placebo | 52 | 9 | Adverse events | **Hepatic fat content by MRI-PDFF, ALT, AST**, Pharmacokinetics |
| 1/2 | Galectin-3 antagonist | GB1211 | NCT04607655 |  | GB1211 | Placebo | 72 | 3 | Adverse events | Pharmacokinetics |
| 1/2 | FGF21 analogue | BIO89-100 | NCT04048135 |  | BIO89-100 | Placebo | 81 | 4 | Adverse events, Pharmacokinetics, **Hepatic fat content by MRI-PDFF** |  |
| 1/2 | Mineralocorticoid  receptor antagonist | Spironolactone | NCT03576755 |  | Spironolactone 100 mg | Placebo | 30 | 12 | Liver stiffness by MRE | NAS |
| 1/2 | PDE non-selective  inhibitor | ZSP1601 | NCT04140123 |  | ZSP1601 | Placebo | 36 | 1 | Adverse events |  |
| 2 | Androgen Receptor  Agonist: Oral bioidentical testosterone prodrug | LPCN 1144 Formulation A, LPCN 1144 Formulation B | NCT04134091 |  | LPCN 1144  Formulation A,  LPCN 1144  Formulation B | Placebo | 75 | 12 | **Hepatic fat content by MRI-PDFF** | NAS, NASH resolution, **NASH resolution with no worsening of fibrosis**, Fibrosis, **≥1 improvement in fibrosis with no worsening of NAS** |
| 2 | Angiogenesis inhibitor | ALS-L1023 | NCT04342793 |  | ALS-L1023 1,200 mg,  ALS-L 1023 1,800 mg | Placebo | 60 | 6 | **Hepatic fat content by MRI-PDFF, ALT, AST** |  |
| 2 | Antioxidants | Vitamin E | NCT03669133 |  | Vitamin E | Placebo | 56 | 12 | **Hepatic fat content by MRI-PDFF** |  |
| 2 | Anti-CCR5 receptor monoclonal antibody | Leronilmab (PRO 140) | NCT04521114 |  | Leronlimab | Placebo | 90 | 3 | Adverse events, FibroScan fibrosis and steatosis score | ALT, AST |
| 2 | Beta-Klotho/FGFR1c receptor complex agonist | MK-3655 | NCT04583423 |  | MK-3655 | Placebo | 328 | 12 | **NASH resolution with no worsening of fibrosis,** Adverse events | **Hepatic fat content by MRI-PDFF, ≥1 improvement in fibrosis with no worsening of NASH**, ≥2 improvement in NAS without worsening of fibrosis |
| 2 | Cardiac glycosides | Digoxin | NCT04216693 |  | Digoxin | Placebo | 60 | 6 | ≥2 improvement in NAS, Steatosis | Fibrosis |
| 2 | CCR2/5 dual receptor antagonist + FXR agonist | Tropifexor + Cenicriviroc | NCT03517540 | TANDEM | Tropifexor, Tropifexor + Cenicriviroc | Cenicriviroc | 200 | 11 | Adverse events | Fibrosis, NASH resolution |
| 2 | CYP2E1 inhibitor | SNP-610 | NCT03468556 |  | SNP-610 | Placebo | 80 | 3 | ALT |  |
| 2 | DGAT2 inhibitors | BMS-986263 | NCT04267393 |  | BMS-986263 | Placebo | 270 | 3 | ≥1 improvement in fibrosis | **≥1 improvement in fibrosis with no worsening of NAS**, ≥2 improvement in fibrosis |
| 2 | FGF21 analogue | BFKB8488A | NCT04171765 | BANFF | BFKB8488A | Placebo | 260 | 12 | **NASH resolution with no worsening of fibrosis** | NAS, Fibrosis |
| 2 | FGF21 analogue | Pegbelgermin (BMS-986036) | NCT03486899 | FALCON 1 | Pegbelgermin | Placebo | 160 | 6 | **≥1 improvement in fibrosis with no worsening of NASH OR NASH resolution with no worsening of fibrosis**, Fibrosis, NAS | **NASH resolution with no worsening of fibrosis**, NASH resolution, NASH improvement, NASH improvement without worsening of fibrosis, **Progression to cirrhosis** |
| 2 | FGF21 analogue | Pegbelgermin (BMS-986036) | NCT03486912 | FALCON 2 | Pegbelgermin | Placebo | 152 | 12 | **≥1 improvement in fibrosis with no worsening of NASH** | NASH resolution, NASH improvement |
| 2 | FXR agonist | EDP-305 | NCT04378010 |  | EDP-305 1.5,  EDP-305 2 mg | Placebo | 336 | 18 | **≥1 improvement in fibrosis with no worsening of NASH AND/OR NASH resolution with no worsening of fibrosis** |  |
| 2 | FXR agonist | EYP001a | NCT03812029 |  | EYP001a | Placebo | 160 | 3 | **Hepatic fat content by MRI-PDFF,** Adverse events |  |
| 2 | FXR agonist | TERN-101 | NCT04328077 |  | TERN-101 | Placebo | 96 | 4 | Adverse events |  |
| 2 | FXR agonist | Tropifexor (LJN452) | NCT04065841 | ELIVATE | Tropifexor | Licogliflozin | 210 | 6 | **NASH resolution with no worsening of fibrosis OR ≥1 improvement in fibrosis with no worsening of NASH** | **≥1 improvement in fibrosis with no worsening of NAS, NASH resolution with no worsening of fibrosis,** Fibrosis, ≥2 improvement in fibrosis with no worsening of NASH |
| 2 | GIP/GLP-1  dual receptor agonist | Tirzepatide | NCT04166773 | SYNERGY-NASH | Tirzepatide | Placebo | 196 | 12 | **NASH resolution with no worsening of fibrosis** | **≥1 improvement in fibrosis with no worsening of NAS**, Fibrosis, ≥2 improvement in NAS with ≥1 improvement in ≥2 NAS components |
| 2 | GLP-1 receptor agonist | Semaglutide | NCT03987451 |  | Semaglutide | Placebo | 65 | 12 | **≥1 improvement in fibrosis with no worsening of NASH** | NASH resolution, Fibrosis, NAS |
| 2 | GLP-1/ GIP/Glucagon Triple Agonist | HM15211 | NCT04505436 |  | HM15211 | Placebo | 112 | 12 | **Hepatic fat content by MRI-PDFF** |  |
| 2 | Insulin | ORMD-0801  (insulin oral formulation) | NCT04618744 |  | ORMD-0801  (insulin oral formulation) | Placebo | 36 | 4 | Adverse events | **Hepatic fat content by MRI-PDFF** |
| 2 | JNK inhibitor | CC-90001 | NCT04048876 |  | CC-90001 | Placebo | 300 | 12 | Fibrosis | **≥1 improvement in fibrosis with no worsening of NAS,** ≥2 improvement in NAS, **NASH resolution with no worsening of fibrosis, Histological progression to cirrhosis** |
| 2 | Ketohexokinase inhibitor | PF-06835919 | NCT03969719 |  | PF-06835919 | Placebo | 150 | 4 | **Hepatic fat content by MRI-PDFF**, HbA1c |  |
| 2 | Mineralocorticoid/glucocorticoid  dual receptor antagonist | Miricorilant (CORT 118335) | NCT03823703 |  | CORT118335 600 mg | Placebo | 120 | 3 | **Hepatic fat content by MRI-PDFF**, Adverse events |  |
| 2 | Mitochondrial pyruvate carrier inhibitor | PXL065 (Deuterium-stabilized R-pioglitazone) | NCT04321343 |  | PXL065 | Placebo | 120 | 9 | **Hepatic fat content by MRI-PDFF** | Liver biopsy |
| 2 | Nutritional intervention | ATI reduced diet | NCT04066400 | NASH-ATI | ATI reduced diet (reduced dietary gluten uptake) | Wheat-based diet | 45 | 4 | **ALT** |  |
| 2 | Pan-Cyclophilin inhibitor | CRV431 | NCT04480710 | AMBITION | CRV431 | Placebo | 18 | 1 | Adverse events, Pharmacokinetics |  |
| 2 | PPARα/γ dual agonist | Saroglitazar | NCT03863574 | EVIDENCES VI | Saroglitazar Mg 2,  Saroglitazar Mg 4 mg | Placebo | 15 | 6 | ≥1 improvement in NAS with no worsening of fibrosis | ≥2 improvement in NAS with improvement in ≥2 NAS components and no worsening of fibrosis, NASH resolution, Steatosis, Inflammation, Ballooning, Fibrosis |
| 2 | PPARσ agonist | Seladelpar | NCT03551522 |  | Seladelpar | Placebo | 181 | 12 | **Hepatic fat content by MRI-PDFF, Adverse events** | **NASH resolution with no worsening of fibrosis, ≥1 improvement in fibrosis with no worsening of NAS**, ≥2 improvement in NAS |
| 2 | Structurally engineered fatty acid | Icosabutate | NCT04052516 | ICONA | Icosabutate | Placebo | 264 | 12 | **NASH resolution with no worsening of fibrosis** | NAS, Steatosis, Ballooning, Inflammation, Fibrosis |
| 2 | Thiazolidinedione | Pioglitazone | NCT04501406 |  | Pioglitazone 15 mg | Placebo | 138 | 18 | ≥2 improvement in NAS without worsening of fibrosis | **NASH resolution with no worsening of fibrosis**, NAS, Steatosis, Ballooning, Lobular inflammation, Fibrosis, ≥2 improvement in fibrosis |
| 2 | THR-β  agonist | VK2809 | NCT04173065 | VOYAGE | VK2809 | Placebo | 337 | 12 | **Hepatic fat content by MRI-PDFF** | **NASH resolution with no worsening of fibrosis** |
| 2 | TLR-4 antagonists | JKB-121 | NCT04255069 |  | JKB-122 | Placebo | 300 | 12 | **NASH resolution with no worsening of fibrosis, ≥1 improvement in fibrosis with no worsening of NAS** | **Hepatic fat content by MRI-PDFF** |
| 3 | Antioxidants | Metadoxine | NCT02541045 |  | Metadoxine | Placebo | 108 | 6 | **NASH resolution with ≥2 improvement in NAS and no worsening of fibrosis, ≥1 improvement in fibrosis with no worsening of NASH** |  |
| 3 | CCR2/5 dual receptor antagonist | Cenicriviroc | NCT03028740 | AURORA | Cenicriviroc | Placebo | 2000 | 12 | **≥1 improvement in fibrosis with no worsening of NASH, Composite endpoint of Histological progression to cirrhosis, liver-related clinical outcome, and all-cause mortality** | **≥1 improvement in fibrosis with no worsening of NASH** |
| 3 | FXR agonist | Obeticholic acid | NCT02548351 | REGENERATE | Obeticholic Acid | Placebo | 2480 | 84 | **≥1 improvement in fibrosis with no worsening of NASH OR NASH resolution with no worsening of fibrosis, Composite endpoint of Histological progression to cirrhosis, all-cause mortality, MELD score ≥15, ascites requiring medical intervention, hospitalization for onset of variceal bleeding, hepatic encephalopathy, or spontaneous bacterial peritonitis** | **≥1 improvement in fibrosis with no worsening of NASH, NASH resolution with no worsening of fibrosis**, No worsening of fibrosis AND no worsening of NASH, Fibrosis, Inflammation, Ballooning, Steatosis, ≥2 improvement in fibrosis, ≥2 improvement in NAS with no worsening of fibrosis, ≥1 improvement in fibrosis and NASH resolution, Fibrosis resolution, **Histological progression to cirrhosis** |
| 3 | Mitochondrial pyruvate carrier inhibitor | MSDC-0602K | NCT03970031 | MMONARCh | MSDC-0602K | Placebo | 3600 | 12 | HbA1c, **NASH resolution with no worsening of fibrosis** |  |
| 3 | SGLT2 inhibitor | Dapagliflozin | NCT03723252 | DEAN | Dapagliflozin | Placebo | 100 | 12 |  | NASH resolution, Fibrosis, NAS |
| 3 | THR-β  agonist | Resmetirom (MGL-3196) | NCT03900429 | MAESTRO-NASH | MGL-3196 | Placebo | 2000 | 12 | **NASH resolution with ≥2 improvement in NAS and no worsening of fibrosis, Composite endpoint of cirrhosis, all-cause mortality, and liver-related clinical outcomes** | **≥1 improvement in fibrosis with no worsening of NAS** |
| 3/4 | SCD inhibitor | Aramchol | NCT04104321 | ARMOR | Aramchol | Placebo | 2000 | 12 | **NASH resolution with no worsening of fibrosis OR ≥1 improvement in fibrosis with no worsening of NASH, Composite endpoint of all-cause mortality, liver transplant, histological progression to cirrhosis, MELD score ≥15, hospitalization due to hepatic decompensated events** |  |
| 4 | GLP-1 RA plus SGLT-2 inhibitors | Semaglutide plus empagliflozin | NCT04639414 | COMBAT_T2_NASH | Semaglutide plus empagliflozin | Empagliflozin  Placebo | 192 | 11 | **NASH resolution with no worsening of fibrosis** | NAS, Fibrosis, Steatosis, Inflammation, Ballooning |
| 4 | GLP-1 RA | Dulaglutide | NCT03648554 | REALIST | Dulaglutide (TRULICITY®) 1.5 mg + Reinforced dietary monitoring | Reinforced dietary monitoring | 93 | 12 | NAS | NASH resolution, Fibrosis, Steatosis, Inflammation, Ballooning |
| 4 | Unspecified mechanism | Berberine | NCT03198572 | EASYBEinNASH | Berberine + Lifestyle intervention | Placebo + Lifestyle intervention | 120 | 48 | ≥1 improvement in the hepatocellular ballooning with no increase in the fibrosis score; and either a decrease in NAS to ≤3; with ≥1 improvement in either the lobular inflammation or steatosis score. | NAS, Steatosis, Ballooning, Inflammation, Fibrosis, NASH resolution |
| N/A | Antioxidants | Vitamin E | NCT02962297 | VENS | Vitamin E | Placebo | 120 | 24 | Either ≥2 improvement in NAS OR post-treatment NAS of ≤3 points with ≥1 improvement ballooning and no worsening of fibrosis |  |
| N/A | Device | Insulin pump therapy | NCT04270656 | STEATO-POMPE | Insulin pump therapy | Multi-injection treatment | 52 | 6 | **Hepatic fat content by MRI-PDFF** |  |
| N/A | Gut microbiota modulation | Oatmeal flakes with prebiotic | NCT03897218 | ADLH | Oatmeal flakes with prebiotic | Millet flakes | 84 | 5 | Steatosis by CAP, **ALT** |  |
| N/A | Gut microbiota modulation | Probiotics | NCT03467282 | PROBILIVER | Probiotic | Placebo | 46 | 6 | Fibrosis by hepatic elastography |  |
| N/A | Gut microbiota modulation | Probiotics | NCT04555434 |  | Probiotic | Placebo | 120 | 2 | **ALT, AST** |  |
| N/A | Gut microbiota modulation | Yaq-001 (non-absorbable carbons of controlled porosity selectively modulating stool microbiome) | NCT03962608 | NASH-Safety | Yaq-001 | Placebo | 70 | 12 | Adverse events |  |
| N/A | Surgical procedure | Bariatric surgery | NCT04298736 | BeLEANeR | Bariatric Surgery | Lifestyle modification | 50 | 12 | NASH resolution |  |
| N/A | Surgical procedure | Bariatric surgery | NCT03472157 | NASHSURG | Bariatric surgery | Lifestyle therapy | 100 | 15 | **NASH resolution with no worsening of fibrosis** | NAS, ≥2 improvement in NAS with no worsening of fibrosis |
| N/A | Surgical procedure | Endomina®, an endoscopic sutured gastroplasty | NCT04653311 | ENDONASH | Endomina®, an endoscopic sutured gastroplasty + Lifestyle intervention | Lifestyle intervention | 100 | 12 | **NASH resolution with no worsening of fibrosis** | NAS, Steatosis, Ballooning, Lobular inflammation, Fibrosis, ALT, AST |
| N/A | Surgical procedure | ESG with OverStitch® system | NCT04060368 | TESLA-NASH | ESG with OverStitch® system + Lifestyle modifications | LSG + Lifestyle modifications | 30 | 24 | **NASH resolution with no worsening of fibrosis,** Fibrosis |  |
| N/A | Surgical procedure | RYGB | NCT03524365 | BRAVES | RYGB + Lifestyle modification or SG + Lifestyle modification | Intensive Lifestyle Modification | 288 | 12 | **NASH resolution with no worsening of fibrosis** | Fibrosis, NASH resolution |
| N/A | Surgical procedure | VSG | NCT03587831 |  | VSG | Lifestyle Modification Counseling | 60 | 12 | NAS |  |

**Abbreviations:** ACC1/2 – acyl-CoA carboxylase isoform 1 and 2, ALT – alanine aminotransferase, AOC3 – amine oxidase copper-containing 3, ASK1 – apoptosis signal-regulating kinase 1, AST – aspartate aminotransferase, ATI – amylase trypsin inhibitor, CAP – controlled attenuate parameter, CCR2/5 – chemokine receptor 2/5, CYP2E1 – cytochrome P450 family 2 subfamily E member 1, DGAT2 – diacylglycerol-acyl transferase-2, ESG – endoscopic sleeve gastroplasty, FASN – fatty acid synthase, FGF – fibroblast growth factor, FGFR1c – fibroblast growth factor receptor 1c, FXR – farnesoid X receptor, GIP/GLP-1 – glucagon-dependent insulinotropic polypeptide and glucagon-like peptide-1, GLP-1 RA – glucagon-like peptide-1 receptor agonist, JNK – Jun N-terminal kinase, LOXL2 – lysyl oxidase-like 2, LSG - laparoscopic sleeve gastrectomy, MRE – magnetic resonance elastography, MRI-PDFF – magnetic resonance imaging proton density fat fraction, N/A – not applicable, NAS – nonalcoholic fatty liver disease activity score, NASH – nonalcoholic steatohepatitis, NMRS – nuclear magnetic resonance spectroscopy, PDE – phosphodiesterase, PPAR – peroxisome proliferator-activated receptor, RCTs – Randomized controlled trials, RNAi – RNA interference, RYGB – Roux-en-Y gastric bypass, SAF – steatosis-activity-fibrosis, SCD – stearoyl Coenzyme A desaturase, SG – sleeve gastrectomy, SGLT2 – sodium-glucose transport protein 2, THR – thyroid hormone receptor, TLR-4 – toll-like receptor 4, VSG – vertical sleeve gastrectomy

**Table S4 Summary of treatment effects of interventions for nonalcoholic steatohepatitis**

**Note:** Non-significant effect (YELLOW), Significant positive effect (GREEN)

| **Intervention** | **Histological outcomes (RR)** | | | | | | | | | | | | | | | **Laboratory outcomes (MD)** | | **Imaging outcomes (MD)** |
| --- | --- | --- | --- | --- | --- | --- | --- | --- | --- | --- | --- | --- | --- | --- | --- | --- | --- | --- |
| **Progression to cirrhosis** | **≥2-point reduction in NAS with ≥1-point reduction in either inflammation or ballooning and no worsening of fibrosis** | **≥2-point reduction in NAS with no worsening of fibrosis** | **≥1-point improvement in fibrosis with no worsening of NASH** | | **NASH resolution with no worsening of fibrosis** | **NASH resolution** | **Fibrosis resolution** | **≥ 2-point improvement in Fibrosis** | **≥ 1-point improvement in Fibrosis** | **≥ 2-point improvement in NAS** | **≥ 1-point improvement in NAS** | **≥ 1-point improvement in Steatosis** | **≥ 1-point improvement in Ballooning** | **≥ 1-point improvement in Inflammation** | **ALT** | **AST** | **Hepatic fat content** |
| **Vs. Placebo** | | | | | | | | | | | | | | | | | | |
| **De novo lipogenesis inhibitors** | | | | | | | | | | | | | | | | | | |
| ACC1/2 inhibitors: Firsocostat 5 mg |  |  |  |  | |  |  |  |  |  |  |  |  |  |  | NR | NR | NR |
| ACC1/2 inhibitors: Firsocostat 20 mg |  |  |  |  | |  |  |  |  |  |  |  |  |  |  | NR | NR | **NR** |
| THR-β selective agonist: Resmetirom |  |  |  |  | | **OR 4.57**  **[1.03, 21.9]** |  |  |  |  | **OR 2.7**  **[1.1, 6.3]** |  |  |  |  | **-26.4**  **[-42.8, -9.9]** | **-11.1**  **[-17.8, -4.3]** |  |
| FASN inhibitor: TVB-2640 25 mg |  |  |  |  | |  |  |  |  |  |  |  |  |  |  | **NR** |  | NR |
| FASN inhibitor: TVB-2640 50 mg |  |  |  |  | |  |  |  |  |  |  |  |  |  |  | **NR** |  | **NR** |
| **FXR agonists** | | | | | | | | | | | | | | | | | | |
| FXR agonist: Cilofexor 30 mg |  |  |  |  | |  |  |  |  |  |  |  |  |  |  | NR | NR | **NR** |
| FXR agonist: Cilofexor 100 mg |  |  |  |  | |  |  |  |  |  |  |  |  |  |  | NR | NR | **NR** |
| FXR agonist: EDP-305 1 mg |  |  |  |  | |  |  |  |  |  |  |  |  |  |  | NR |  | NR |
| FXR agonist EDP-305 2.5 mg |  |  |  |  | |  |  |  |  |  |  |  |  |  |  | **NR** |  | **NR** |
| FXR agonist: MET409 50 mg |  |  |  |  | |  |  |  |  |  |  |  |  |  |  | **NR** |  | **NR** |
| FXR agonist: MET409 80 mg |  |  |  |  | |  |  |  |  |  |  |  |  |  |  | **NR** |  | **NR** |
| FXR agonist: Nidufexor 50 mg |  |  |  |  | |  |  |  |  |  |  |  |  |  |  | **NR** |  | **NR** |
| FXR agonist: Nidufexor 100 mg |  |  |  |  | |  |  |  |  |  |  |  |  |  |  | **NR** |  | **NR** |
| FXR agonist: Obeticholic acid 10 mg (REGENERATE) |  |  | **1.2**  **[1.0, 1.6]** | **1.5**  **[1.0, 2.2]** | | 1.4  [0.9, 2.3] |  | 2.0  [0.6, 6.4] |  |  | 1.3  [0.7, 2.4] |  | 1.1  [0.9, 1.3] | 1.2  [0.9, 1.5] | 1.1  [0.9, 1.4] |  |  |  |
| FXR agonist: Obeticholic acid 25 mg (REGENERATE) |  |  | **1.5**  **[1.2, 1.9]** | **1.9**  **[1.4, 2.8]** | | 1.5  [0.9, 2.4] |  | 2.5  [0.8, 7.9] |  |  | **2.0**  **[1.1, 3.7]** |  | 1.1  [0.9, 1.3] | **1.5**  **[1.2, 2.0]** | **1.2**  **[1.0, 1.5]** |  |  |  |
| FXR agonist: Obeticholic acid 25 mg (FLINT) |  |  | **2.2**  **[1.4, 3.3]** |  | |  | 1.70  [0.89, 3.25] |  |  | **1.91**  **[1.15, 3.16]** |  | **2.19**  **[1.42, 3.28]** | **1.69**  **[1.21, 2.36]** | **1.58**  **[1.06, 2.34]** | **1.60**  **[1.12, 2.29]** | **-20**  **[-28, -11]** | **-12**  **[-18. -6]** |  |
| FXR agonist: Tropifexor 140 mcg |  |  |  |  | |  |  |  |  |  |  |  |  |  |  | **NR** | NR | **NR** |
| FXR agonist: Tropifexor 200 mcg |  |  |  |  | |  |  |  |  |  |  |  |  |  |  | **NR** | NR | **NR** |
| FXR agonist: Ursodeoxycholic acid |  |  |  |  | |  | OR 1.85  [0.88, 3.89] |  |  |  |  |  |  |  |  |  |  |  |
| **FGF analogues** | | | | | | | | | | | | | | | | | | |
| FGF-19 analogue: Aldafermin (NGM282) 3 mg |  |  |  |  | |  |  |  |  |  |  |  |  |  |  | **-35.1**  **[-47.1, -23.1]** | **-20.4**  **[-29.8, -11.0]** | **RR 10.0**  **[2.6, 38.7]**  ***(≥5% reduction)*** |
| FGF-19 analogue: Aldafermin (NGM282) 6 mg |  |  |  |  | |  |  |  |  |  |  |  |  |  |  | **-36.5**  **[-48.7, -24.2]** | **-22.5**  **[-32.4, -12.7]** | **RR 11.4**  **[3.0, 43.8]**  ***(≥5% reduction)*** |
| FGF-19 analogue: Aldafermin (NGM282) 1 mg  (ALPINE 2/3) |  |  |  | NR | | NR |  |  |  |  |  |  |  |  |  | **NR** | **NR** | **NR** |
| FGF-21 analogue: Pegbelfermin 10 mg |  |  |  |  | |  |  |  |  |  |  |  |  |  |  | NR | NR | **-5.5**  **[-8.0, -2.8]** |
| FGF-21 analogue: Pegbelfermin 20 mg |  |  |  |  | |  |  |  |  |  |  |  |  |  |  | NR | NR | **-3.9**  **[-6.5, -1.2]** |
| FGF-21 analogue: Efruxifermin |  |  |  |  | |  |  |  |  |  |  |  |  |  |  | **NR** |  | **NR** |
| **Antimetabolic agents** | | | | | | | | | | | | | | | | | | |
| Anti-CD3 mAb: Muromonab-CD3 |  |  |  |  | |  |  |  |  |  |  |  |  |  |  | NR | **NR** |  |
| ASBT inhibitor: Volixibat 5 mg |  |  | 0.95  [0.33, 2.68] |  | | 0.47  [0.11, 1.98] |  |  |  | 1.18  [0.46, 3.04] |  |  |  |  |  | 11.8  [-1.2, 24.5] |  | -0,6  [-2.3, 1.2] |
| ASBT inhibitor: Volixibat 10 mg |  |  | 0.47  [0.11, 1.98] |  | | 0.71  [0.22, 2.32] |  |  |  | 0.47  [0.11, 1.98] |  |  |  |  |  | 11.4  [-1.5, 23.8] |  | -0.6  [-2.3, 1.3] |
| ASBT inhibitor: Volixibat 20 mg |  |  | 0.98  [0.32, 3.01] |  | | 0.65  [0.16, 2.59] |  |  |  | 0.33  [0.05, 2.30] |  |  |  |  |  | 10.1  [-3.8, 22.4] |  | -0.7  [-2.6, 1.1] |
| Cholesterol-lowering agents: Ezetimibe |  |  |  |  | |  | OR 1.08  [0.25, 4.70] |  |  |  |  |  |  |  |  |  |  |  |
| DPP-4 inhibitor: Sitagliptin |  |  |  |  | |  |  |  |  |  |  |  |  |  |  | -5  [-51, 41] | -5  [-51, 41] | 2.0  [-7.3, 11.2] |
| GLP-1 RA: Liraglutide |  |  |  |  | | **4.3**  **[1.0, 17.7]** | **OR 6.23**  **[1.20, 34.41]** |  |  | 1.9  [0.5, 6.7] |  | 1.2  [0.8, 1.7] | **1.8**  **[1.1, 3.0]** | 1.9  [1.0, 3.8] | 0.9  [0.5, 1.6] | -10.7  [-25.9, 4.5] | -6.7  [-19.3, 5.9] |  |
| GLP-1 RA: Semaglutide 0.1 mg |  |  |  | OR 1.96  [0.86, 4.51] | | **OR 3.36 [1.29, 8.86]** |  |  |  |  |  |  |  |  |  |  |  |  |
| GLP-1 RA: Semaglutide 0.2 mg |  |  |  | OR 1.00 [0.43, 2.32] | | **OR 2.71 [1.06, 7.56]** |  |  |  |  |  |  |  |  |  |  |  |  |
| GLP-1 RA: Semaglutide 0.4 mg |  |  |  | OR 1.42 [0.62, 3.28] | | **OR 6.87 [2.60, 17.63]** |  |  |  |  |  |  |  |  |  |  |  |  |
| Metformin |  |  |  |  | |  |  |  |  |  |  |  |  |  |  | -5.18  [-25.72, 15.35] | -6.69  [-20.24, 6.86] |  |
| Metformin + TZDs |  |  |  |  | |  |  |  |  | 4.68  [0.26, 83.63] |  |  |  |  |  |  |  |  |
| PPAR-α/δ dual agonist: Elafibranor (GOLDEN-505) |  |  |  |  | | **OR 2.31**  **[1.02, 5.24]** |  |  |  |  |  |  |  |  |  |  |  |  |
| PPAR-α/δ dual agonist: Elafibranor (RESOLVE-IT) |  |  |  |  | | OR 1.38 [0.97, 1.95] |  |  |  | OR 1.13 [0.83, 1.53] |  |  |  |  |  |  |  |  |
| PPAR-γ sparing modulator: MSDC-0602 K 62.5 mg |  | OR 0.89  [0.44, 1.81] |  |  | |  |  |  |  |  |  |  |  |  |  | NR | NR |  |
| PPAR-γ sparing modulator: MSDC-0602 K 125 mg |  | OR 1.22  [0.60, 2.48] |  |  | |  |  |  |  |  |  |  |  |  |  | **NR** | **NR** |  |
| PPAR-γ sparing modulator: MSDC-0602 K 250 mg |  | OR 1.64  [0.83, 3.27] |  |  | |  |  |  |  |  |  |  |  |  |  | **NR** | **NR** |  |
| PPAR-α/δ/γ pan agonist: Lanifibranor 800 mg |  |  |  | 1.18  [0.70, 2.00] | | **1.76 [1.01, 3.05]** |  |  |  |  |  |  |  |  |  |  |  |  |
| PPAR-α/δ/γ pan agonist: Lanifibranor 1200 mg |  |  |  | **1.80**  **[1.13, 2.87]** | | **2.40 [1.43, 4.03]** |  |  |  |  |  |  |  |  |  |  |  |  |
| TZDs: Pioglitazone, Rosiglitazone | OR 5.99  [0.71, 50.28] |  |  |  | |  | OR 1.68  [0.44, 6.44] |  |  | OR 1.58  [0.98, 2.54] |  |  | **OR 3.51**  **[2.14, 5.78]** | OR 1.84  [0.94, 3.58] | **OR 2.65**  **[1.69, 4.15]** |  |  |  |
| TZDs: Pioglitazone phase 4, Cusi |  |  | **3.29**  **[1.74, 6.22]** |  | |  | **2.65**  **[1.43, 4.91]** |  |  | 1.57  [0.88, 2.80] |  |  | **2.75**  **[1.66, 4.54]** | **2.13**  **[1.21, 3.75]** | **2.32**  **[1.28, 4.19]** | **-24**  **[-35, -12]** | **-14**  **[-22, -6]** | **-7**  **[-10, -4]** |
| **Antioxidants** | | | | | | | | | | | | | | | | | | |
| Anti-TNF-α agent: Pentoxifylline |  |  |  |  | |  |  |  |  | 2.27  [0.81, 6.36] |  | **2.70**  **[1.21, 6.03]** | **2.40**  **[1.15, 5.03]** | 1.73  [0.48, 6.24] | 1.73  [0.48, 6.24] |  |  |  |
| Betain |  |  |  |  | |  |  |  |  |  |  | 0.38  [0.14, 1.04] |  |  |  |  |  |  |
| Metadoxine |  |  |  |  | |  |  |  |  | 1.35  [0.57, 3.21] |  |  | **2.97**  **[1.52, 2.67]** |  |  |  |  |  |
| Silymarin - Navarro |  |  |  |  | |  |  |  |  | 0.93  [0.38, 2.27] | 1.23  [0.31, 4.98] | 1.08  [0.42, 2.78] | 1.16  [0.35, 3.83] | 0.93  [0.30, 2.82] | 0.79  [0.31, 2.04] |  |  |  |
| Silymarin – Wah Kheong | 0.34  [0.04, 3.16] |  |  |  | | 1.30  [0.66, 2.57] |  | 1.70  [0.43, 6.73] |  | **3.74**  **[1.11, 12.60]** |  | 0.98  [0.68, 1.42] | 0.71  [0.33, 1.50] | 1.20  [0.72, 2.00] | 1.09  [0.61, 1.95] |  |  |  |
| Silymarin - Lombardi | OR 0.11  [0.01, 2.15] |  |  |  | |  | OR 11.72  [0.60, 227.31] |  |  |  |  |  |  |  |  |  |  |  |
| Vitamin D |  |  |  |  | |  |  |  |  |  |  |  |  |  |  | NR | NR |  |
| Vitamin E plus Vitamin C |  |  |  |  | |  | **OR 2.14**  **[1.10, 4.19]** |  |  |  |  |  |  |  |  |  |  |  |
| **Anti-inflammatory agents** |  |  |  |  | |  |  |  |  |  |  |  |  |  |  |  |  |  |
| Anti-LPS immunoglobulins: IMM-124E |  |  |  |  | |  |  |  |  |  |  |  |  |  |  | **NR** | **NR** |  |
| ARBs |  |  |  |  | |  |  |  |  |  |  |  |  |  |  | -5.18  [-25.72, 15.35] | -6.69  [-20.24, 6.86] |  |
| Omega-3 PUFAs |  |  |  |  | |  |  |  |  | 0.58  [0.22, 1.57] |  | 0.89  [0.61, 1.29] | 0.84  [0.43, 1.65] | 0.63  [0.29, 1.38] | 0.74  [0.36, 1.52] |  |  |  |
| TLR4 antagonists: JKB-121 |  |  |  |  | |  |  |  |  |  |  |  |  |  |  | NR |  | NR |
| **Anti-apoptotic agents** | | | | | | | | | | | | | | | | | | |
| Pan-caspase inhibitor: Emricasan 5 mg |  |  |  | OR 0.54  [0.25, 1.16] | | OR 0.33  [0.10, 1.08] |  | OR 0.78  [0.20, 2.98] |  |  | OR 0.52  [0.23, 1.15] |  |  |  |  |  |  |  |
| Pan-caspase inhibitor: Emricasan 50 mg |  |  |  | OR 0.59  [0.28, 1.27] | | OR 0.60  [0.22, 1.62] |  | OR 0.19  [0.02, 1.66] |  |  | OR 0.47  [0.21, 1.07] |  |  |  |  |  |  |  |
| **Anti-fibrotic agents** | | | | | | | | | | | | | | | | | | |
| Anti-LOXL2 mAb: Simtuzumab 75 mg | 0.89  [0.45, 1.75] |  |  |  | |  | 1.88  [0.33, 10.77] |  |  | 0.83  [0.43, 1.62] | 1.85  [0.87, 3.93] |  |  |  |  |  |  |  |
| Anti-LOXL2 mAb: Simtuzumab 125 mg | 0.96  [0.50, 1.83] |  |  |  | |  | 2.18  [0.42, 11.45] |  |  | 0.77  [0.40, 1.51] | 1.49  [0.68, 3.25] |  |  |  |  |  |  |  |
| ASK1 inhibitor: Selonsertib 6 mg | 0.99  [0.64, 1.54] |  |  | 0.92  [0.56, 1.51] | | 0.50  [0.24, 1.01] |  |  |  | 0.84  [0.54, 1.31] |  |  |  |  |  | NR | NR |  |
| ASK1 inhibitor: Selonsertib 18 mg | 0.83  [0.53, 1.31] |  |  | 0.73  [0.43, 1.23] | | 0.56  [0.28, 1.13] |  |  |  | 0.78  [0.49, 1.23] |  |  |  |  |  | NR | NR |  |
| CCR2/5 dual antagonist: Cenicriviroc |  | OR 0.82  [0.44, 1.52] |  | **OR 2.20 [1.11, 4.35]  (1 yr)** | OR  1.15 [0.48, 2.75]  (2 yr) | OR 1.40  [0.54-3.63] |  |  |  |  |  |  |  |  |  |  |  |  |
| **Others** | | | | | | | | | | | | | | | | | | |
| Antibiotics: Rifaximin |  |  |  |  | |  |  |  |  |  |  |  |  |  |  | **-0.76**  **[-1.32, -0.19]** | **-0.58**  **[-1.14, -0.03]** |  |
| Moderate aerobic exercise |  |  |  |  | |  |  |  |  |  |  |  |  |  |  | **NR** | **NR** |  |
| Prebiotics |  |  |  |  | |  |  |  |  |  |  |  |  |  |  | NR |  |  |
| Probiotics |  |  |  |  | |  |  |  |  |  |  |  |  |  |  | NR |  |  |
| **Vs. Active comparators** | | | | | | | | | | | | | | | | | | |
| Dietary intervention + Nutritional orientation (vs. Nutritional orientation) |  |  |  |  | |  |  |  |  |  |  |  |  |  |  | NR | **NR** |  |
| Fast weight loss method (vs. conventional drug treatment) |  |  |  |  | |  |  |  |  |  |  |  |  |  |  | **-4.50**  **[-5.41, -3.60]** | **-7.18**  **[-8.50, -5.87]** |  |
| Metformin + N-acetylcysteine (vs. Metformin + Ursodeoxycholic acid) |  |  |  |  | |  |  |  |  |  |  |  |  |  |  | NR | NR |  |
| Metformin + N-acetylcysteine + Ursodeoxycholic acid (vs. Metformin + Ursodeoxycholic acid) |  |  |  |  | |  |  |  |  |  |  |  |  |  |  | NR | NR |  |
| Metformin + N-acetylcysteine + Ursodeoxycholic acid (vs. Metformin + Ursodeoxycholic acid) |  |  |  |  | |  |  |  |  |  |  |  |  |  |  | NR | NR |  |
| TZDs (vs. Placebo OR Metformin OR Metformin + TZD OR Vitamin E) |  |  |  |  | |  |  |  |  | **1.38**  **[1.01, 1.89]** |  |  | **2.03**  **[1.57, 2.62]** | **1.62**  **[1.15, 2.28]** | **1.71**  **[1.32, 2.21]** | **-14.00**  **[-24.00, -11.00]** |  |  |
| TZDs (vs. Vitamin E) |  |  |  |  | |  | OR 1.63  [0.87, 3.05] |  |  |  |  |  |  |  |  |  |  |  |
| TZDs + ARBs (vs. TZDs) |  |  |  |  | |  | 0.76  [0.37, 1.57] |  |  | 0.91  [0.48, 1.73] |  | 1.14  [0.76, 1.71] | 1.42  [0.90, 2.26] | 0.99  [0.49, 2.00] | 0.91  [0.46, 1.80] |  |  |  |
| TZDs + Metformin (vs. TZDs + ARBs) |  |  |  |  | |  | 0.92  [0.42, 2.00] |  |  | 1.20  [0.66, 1.98] |  | 0.73  [0.48, 1.13] | 0.84  [0.57, 1.26] | 0.84  [0.41, 1.71] | 0.84  [0.41, 1.71] |  |  |  |
| Vitamin E (vs. TZD) |  |  |  |  | |  | 0.84  [0.56, 1.23] |  |  | 1.01  [0.69, 1.49] |  | 1.27  [0.86, 2.34] | 0.85  [0.65, 1.12] | 1.23  [0.86, 1.75] | 0.97  [0.72, 1.32] |  |  |  |
| Vitamin E + Vitamin C (vs. Ursodeoxycholic acid) |  |  |  |  | |  |  |  |  |  |  |  |  |  |  | **NR** |  |  |

**Abbreviations:** ACC1/2 – acyl-CoA carboxylase isoform 1 and 2, ALT – alanine aminotransferase, ARBs – angiotensin receptor blockers, ASBT – apical sodium-dependent bile acid transporter, ASK1 – apoptosis signal-regulating kinase 1, AST – aspartate aminotransferase, CCR2/5 – chemokine receptor 2/5, DPP-4 – dipeptidyl peptidase-4, FASN – fatty acid synthase, FGF – fibroblast growth factor, FXR – farnesoid X receptor, GLP-1 RA – glucagon-like peptide-1 receptor agonist, LOXL2 – lysyl oxidase-like 2, LPS – lipopolysaccharide, mAb – monoclonal antibody, NAS – nonalcoholic fatty liver disease activity score, NASH – nonalcoholic steatohepatitis, NR – not report, OR – odd ratio, PPAR – peroxisome proliferator-activated receptor, PUFAs – poly unsaturated fatty acids, THR – thyroid hormone receptor, TLR4 – toll-like receptor 4, TNF – tumor necrosis factor, TZDs – thiazolidinediones

**References**

1. Mahady SE, Webster AC, Walker S, Sanyal A, George J. The role of thiazolidinediones in non-alcoholic steatohepatitis - a systematic review and meta analysis. J Hepatol 2011:55:1383-90. doi: 10.1016/j.jhep.2011.03.016.

2. Li Y, Liu L, Wang B, Wang J, Chen D. Metformin in non-alcoholic fatty liver disease: A systematic review and meta-analysis. Biomed Rep 2013:1:57-64. doi: 10.3892/br.2012.18.

3. Sawangjit R, Chongmelaxme B, Phisalprapa P, Saokaew S, Thakkinstian A, Kowdley KV, et al. Comparative efficacy of interventions on nonalcoholic fatty liver disease (NAFLD): A PRISMA-compliant systematic review and network meta-analysis. Medicine (Baltimore) 2016:95:e4529. doi: 10.1097/md.0000000000004529.

4. Said A, Akhter A. Meta-Analysis of Randomized Controlled Trials of Pharmacologic Agents in Non-alcoholic Steatohepatitis. Ann Hepatol 2017:16:538-47. doi: 10.5604/01.3001.0010.0284.

5. Lombardi R, Onali S, Thorburn D, Davidson BR, Gurusamy KS, Tsochatzis E. Pharmacological interventions for non-alcohol related fatty liver disease (NAFLD): an attempted network meta-analysis. Cochrane Database Syst Rev 2017:3:Cd011640. doi: 10.1002/14651858.CD011640.pub2.

6. Li Y, Xu H, Wu W, Ye J, Fang D, Shi D, et al. Clinical application of angiotensin receptor blockers in patients with non-alcoholic fatty liver disease: a systematic review and meta-analysis. Oncotarget 2018:9:24155-67. doi: 10.18632/oncotarget.23816.

7. Lalazar G, Mizrahi M, Turgeman I, Adar T, Ben Ya'acov A, Shabat Y, et al. Oral Administration of OKT3 MAb to Patients with NASH, Promotes Regulatory T-cell Induction, and Alleviates Insulin Resistance: Results of a Phase IIa Blinded Placebo-Controlled Trial. J Clin Immunol 2015:35:399-407. doi: 10.1007/s10875-015-0160-6.

8. Abd El-Kader SM, Al-Shreef FM, Al-Jiffri OH. Biochemical parameters response to weight loss in patients with non-alcoholic steatohepatitis. Afr Health Sci 2016:16:242-9. doi: 10.4314/ahs.v16i1.32.

9. Armstrong MJ, Hull D, Guo K, Barton D, Hazlehurst JM, Gathercole LL, et al. Glucagon-like peptide 1 decreases lipotoxicity in non-alcoholic steatohepatitis. J Hepatol 2016:64:399-408. doi: 10.1016/j.jhep.2015.08.038.

10. Armstrong MJ, Gaunt P, Aithal GP, Barton D, Hull D, Parker R, et al. Liraglutide safety and efficacy in patients with non-alcoholic steatohepatitis (LEAN): a multicentre, double-blind, randomised, placebo-controlled phase 2 study. Lancet 2016:387:679-90. doi: 10.1016/s0140-6736(15)00803-x.

11. Cusi K, Orsak B, Bril F, Lomonaco R, Hecht J, Ortiz-Lopez C, et al. Long-Term Pioglitazone Treatment for Patients With Nonalcoholic Steatohepatitis and Prediabetes or Type 2 Diabetes Mellitus: A Randomized Trial. Ann Intern Med 2016:165:305-15. doi: 10.7326/m15-1774.

12. Ratziu V, Harrison SA, Francque S, Bedossa P, Lehert P, Serfaty L, et al. Elafibranor, an Agonist of the Peroxisome Proliferator-Activated Receptor-α and -δ, Induces Resolution of Nonalcoholic Steatohepatitis Without Fibrosis Worsening. Gastroenterology 2016:150:1147-59.e5. doi: 10.1053/j.gastro.2016.01.038.

13. Joy TR, McKenzie CA, Tirona RG, Summers K, Seney S, Chakrabarti S, et al. Sitagliptin in patients with non-alcoholic steatohepatitis: A randomized, placebo-controlled trial. World J Gastroenterol 2017:23:141-50. doi: 10.3748/wjg.v23.i1.141.

14. Wah Kheong C, Nik Mustapha NR, Mahadeva S. A Randomized Trial of Silymarin for the Treatment of Nonalcoholic Steatohepatitis. Clin Gastroenterol Hepatol 2017:15:1940-9.e8. doi: 10.1016/j.cgh.2017.04.016.

15. Abdel-Razik A, Mousa N, Shabana W, Refaey M, Elzehery R, Elhelaly R, et al. Rifaximin in nonalcoholic fatty liver disease: hit multiple targets with a single shot. Eur J Gastroenterol Hepatol 2018:30:1237-46. doi: 10.1097/meg.0000000000001232.

16. Friedman SL, Ratziu V, Harrison SA, Abdelmalek MF, Aithal GP, Caballeria J, et al. A randomized, placebo-controlled trial of cenicriviroc for treatment of nonalcoholic steatohepatitis with fibrosis. Hepatology 2018:67:1754-67. doi: 10.1002/hep.29477.

17. Geier A, Eichinger M, Stirnimann G, Semela D, Tay F, Seifert B, et al. Treatment of non-alcoholic steatohepatitis patients with vitamin D: a double-blinded, randomized, placebo-controlled pilot study. Scand J Gastroenterol 2018:53:1114-20. doi: 10.1080/00365521.2018.1501091.

18. Harrison SA, Rinella ME, Abdelmalek MF, Trotter JF, Paredes AH, Arnold HL, et al. NGM282 for treatment of non-alcoholic steatohepatitis: a multicentre, randomised, double-blind, placebo-controlled, phase 2 trial. Lancet 2018:391:1174-85. doi: 10.1016/s0140-6736(18)30474-4.

19. Harrison SA, Abdelmalek MF, Caldwell S, Shiffman ML, Diehl AM, Ghalib R, et al. Simtuzumab Is Ineffective for Patients With Bridging Fibrosis or Compensated Cirrhosis Caused by Nonalcoholic Steatohepatitis. Gastroenterology 2018:155:1140-53. doi: 10.1053/j.gastro.2018.07.006.

20. Loomba R, Kayali Z, Noureddin M, Ruane P, Lawitz EJ, Bennett M, et al. GS-0976 Reduces Hepatic Steatosis and Fibrosis Markers in Patients With Nonalcoholic Fatty Liver Disease. Gastroenterology 2018:155:1463-73.e6. doi: 10.1053/j.gastro.2018.07.027.

21. Barbakadze G, Khachidze T, Sulaberidze G, Burnadze K, Jebashvili M. COMPARATIVE ANALYSIS OF EFFICIENCY OF URSODEOXYCHOLIC ACID AND COMBINATION OF VITAMIN E AND VITAMIN C IN TREATMENT OF NON-DIABETIC NONALCOHOLIC STEATOHEPATITIS. Georgian Med News 2019:81-5.

22. Bomhof MR, Parnell JA, Ramay HR, Crotty P, Rioux KP, Probert CS, et al. Histological improvement of non-alcoholic steatohepatitis with a prebiotic: a pilot clinical trial. Eur J Nutr 2019:58:1735-45. doi: 10.1007/s00394-018-1721-2.

23. Ghetti FF, De Oliveira DG, De Oliveira JM, Ferreira L, Cesar DE, Moreira APB. Effects of Dietary Intervention on Gut Microbiota and Metabolic-Nutritional Profile of Outpatients with Non-Alcoholic Steatohepatitis: a Randomized Clinical Trial. J Gastrointestin Liver Dis 2019:28:279-87. doi: 10.15403/jgld-197.

24. Harrison SA, Bashir MR, Guy CD, Zhou R, Moylan CA, Frias JP, et al. Resmetirom (MGL-3196) for the treatment of non-alcoholic steatohepatitis: a multicentre, randomised, double-blind, placebo-controlled, phase 2 trial. Lancet 2019:394:2012-24. doi: 10.1016/s0140-6736(19)32517-6.

25. Navarro VJ, Belle SH, D'Amato M, Adfhal N, Brunt EM, Fried MW, et al. Silymarin in non-cirrhotics with non-alcoholic steatohepatitis: A randomized, double-blind, placebo controlled trial. PLoS One 2019:14:e0221683. doi: 10.1371/journal.pone.0221683.

26. Oliveira CP, Cotrim HP, Stefano JT, Siqueira ACG, Salgado ALA, Parise ER. N-ACETYLCYSTEINE AND/OR URSODEOXYCHOLIC ACID ASSOCIATED WITH METFORMIN IN NON-ALCOHOLIC STEATOHEPATITIS: AN OPEN-LABEL MULTICENTER RANDOMIZED CONTROLLED TRIAL. Arq Gastroenterol 2019:56:184-90. doi: 10.1590/s0004-2803.201900000-36.

27. Oshakbayev K, Bimbetov B, Manekenova K, Bedelbayeva G, Mustafin K, Dukenbayeva B. Severe nonalcoholic steatohepatitis and type 2 diabetes: liver histology after weight loss therapy in a randomized clinical trial. Curr Med Res Opin 2019:35:157-65. doi: 10.1080/03007995.2018.1547696.

28. Sanyal A, Charles ED, Neuschwander-Tetri BA, Loomba R, Harrison SA, Abdelmalek MF, et al. Pegbelfermin (BMS-986036), a PEGylated fibroblast growth factor 21 analogue, in patients with non-alcoholic steatohepatitis: a randomised, double-blind, placebo-controlled, phase 2a trial. Lancet 2019:392:2705-17. doi: 10.1016/s0140-6736(18)31785-9.

29. Younossi ZM, Ratziu V, Loomba R, Rinella M, Anstee QM, Goodman Z, et al. Obeticholic acid for the treatment of non-alcoholic steatohepatitis: interim analysis from a multicentre, randomised, placebo-controlled phase 3 trial. Lancet 2019:394:2184-96. doi: 10.1016/s0140-6736(19)33041-7.

30. Harrison SA, Alkhouri N, Davison BA, Sanyal A, Edwards C, Colca JR, et al. Insulin sensitizer MSDC-0602K in non-alcoholic steatohepatitis: A randomized, double-blind, placebo-controlled phase IIb study. J Hepatol 2020:72:613-26. doi: 10.1016/j.jhep.2019.10.023.

31. Harrison SA, Wong VW, Okanoue T, Bzowej N, Vuppalanchi R, Younes Z, et al. Selonsertib for patients with bridging fibrosis or compensated cirrhosis due to NASH: Results from randomized phase III STELLAR trials. J Hepatol 2020. doi: 10.1016/j.jhep.2020.02.027.

32. Harrison SA, Goodman Z, Jabbar A, Vemulapalli R, Younes ZH, Freilich B, et al. A randomized, placebo-controlled trial of emricasan in patients with NASH and F1-F3 fibrosis. J Hepatol 2020:72:816-27. doi: 10.1016/j.jhep.2019.11.024.

33. Newsome PN, Palmer M, Freilich B, Sheikh MY, Sheikh A, Sarles H, et al. Volixibat in adults with non-alcoholic steatohepatitis: 24-week interim analysis from a randomized, phase II study. J Hepatol 2020.

34. Newsome PN, Buchholtz K, Cusi K, Linder M, Okanoue T, Ratziu V, et al. A Placebo-Controlled Trial of Subcutaneous Semaglutide in Nonalcoholic Steatohepatitis. New England Journal of Medicine 2020.

35. Patel K, Harrison SA, Elkashab M, Trotter JF, Herring R, Rojter S, et al. Cilofexor, a Nonsteroidal FXR Agonist, in Non-Cirrhotic Patients with Nonalcoholic Steatohepatitis: A Phase 2 Randomized Controlled Trial. Hepatol 2020. doi: 10.1002/hep.31205.

36. Ratziu V, Sanyal A, Harrison SA, Wong VW, Francque S, Goodman Z, et al. Cenicriviroc Treatment for Adults with Nonalcoholic Steatohepatitis and Fibrosis: Final Analysis of the Phase 2b CENTAUR Study. Hepatol 2020. doi: 10.1002/hep.31108.

37. Abdelmalek MF, Freilich BL, Harrison S, Powell EE, Rinella M, Tobis N, et al.: Imm-124E Improves Metabolic Endotoxemia and Markers of Liver Injury in Nonalcoholic Steatohepatitis. In. *Hepatol*. Volume 68. WILEY 111 RIVER ST, HOBOKEN 07030-5774, NJ USA, 2018; 68A-9A.

38. Diehl A, Harrison S, Caldwell S, Rinella M, Paredes A, Moylan C, et al. JKB-121 in patients with nonalcoholic steatohepatitis: A phase 2 double blind randomized placebo control study. J Hepatol 2018:68:S103.

39. Port G, Tovo C, Fernandes S, Peres A, Dornelles G, Pinto G, et al. FRI-277-Effect of probiotics in the treatment of NASH: A randomized clinical trial. J Hepatol 2019:70:e517.

40. Francque SM, Bedossa P, Ratziu V, Anstee QM, Bugianesi E, Sanyal AJ, et al.: The panPPAR agonist lanifibranor induces both resolution of NASH and regression of fibrosis after 24 weeks of treatment in non-cirrhotic nash: results of the NATIVE phase 2b trial. In. *Hepatology*. Volume 72. WILEY 111 RIVER ST, HOBOKEN 07030-5774, NJ USA, 2020; 9A-11A.

41. Harrison SA, Ruane PJ, Freilich BL, Neff G, Patil R, Behling CA, et al.: EFRUXIFERMIN (EFX), A LONG-ACTING FC-FGF21 FUSION PROTEIN, ADMINISTERED FOR 16 WEEKS TO PATIENTS WITH NASH SUBSTANTIALLY REDUCES LIVER FAT AND ALT, AND IMPROVES LIVER HISTOLOGY: ANALYSIS OF A RANDOMIZED, PLACEBO-CONTROLLED, PHASE 2a STUDY (BALANCED). In. *HEPATOLOGY*. Volume 72. WILEY 111 RIVER ST, HOBOKEN 07030-5774, NJ USA, 2020; 6A-7A.

42. Harrison SA, Neff G, Guy CD, Bashir M, Paredes A, Pablo Fries J, et al.: FINAL ANALYSIS OF A 24-WEEK, RANDOMIZED, DOUBLE-BLIND, PLACEBO-CONTROLLED, MULTICENTER STUDY OF ALDAFERMIN (NGM282) IN PATIENTS WITH NONALCOHOLIC STEATOHEPATITIS. In. *HEPATOLOGY*. Volume 72. WILEY 111 RIVER ST, HOBOKEN 07030-5774, NJ USA, 2020; 55A-6A.

43. Loomba R, Rinella ME, Harrison SA, Wong V, Ratziu V, Gores GJ, et al.: NOVEL, FIRST-IN-CLASS, FATTY ACID SYNTHASE (FASN) INHIBITOR, TVB-2640 DEMONSTRATES CLINICALLY SIGNIFICANT REDUCTION IN LIVER FAT BY MRI-PDFF, AND ALT IN NASH: A PHASE 2 RANDOMIZED PLACEBO-CONTROLLED TRIAL (FASCINATE-1). In. *HEPATOLOGY*. Volume 72. WILEY 111 RIVER ST, HOBOKEN 07030-5774, NJ USA, 2020; 50A-1A.

44. Lucas KJ, Lopez P, Lawitz EJ, Sheikh A, Aizenberg D, Hsia S, et al.: SAFETY AND EFFICACY OF TROPIFEXOR IN PATIENTS WITH FIBROTIC NONALCOHOLIC STEATOHEPATITIS: 48-WEEK RESULTS FROM PART C OF THE PHASE 2 FLIGHT-FXR STUDY. In. *HEPATOLOGY*. Volume 72. WILEY 111 RIVER ST, HOBOKEN 07030-5774, NJ USA, 2020; 101A-2A.

45. Aspinall R, Shennak M, Stocia G, Quinn D, Javashvili L, Molteni V, et al. Nidufexor, a non-bile acid FXR agonist, decreases ALT and hepatic fat fraction in patients with NASH after 12 weeks dosing. Journal of Hepatology 2020:73:S4-S5.

46. Lawitz E, Bashir M, Shim-Lopez J, Lee J, Song K, Chen H, et al. MET409, an optimized farnesoid X receptor agonist, decreased liver fat and improved liver enzymes in patients with non-alcoholic steatohepatitis: a 12-week, randomized, placebo-controlled study. Journal of Hepatology 2020:73:S132.

47. Ratziu V, Rinella M, Tetri B, Lawitz E, Denham D, Kayali Z, et al. AS078 - EDP-305, a non-bile acid farnesoid X receptor (FXR) agonist, showed statistically significant improvements in liver biochemistry and hepatic steatosis in the phase 2a argon-1 study. Journal of Hepatology 2020:73:S56-S7. doi: <https://doi.org/10.1016/S0168-8278(20)30657-7>.
